# Supplementary material for: Transcriptomic and Metabolomic Analyses of Palaemon carinicauda Hepatopancreas in Response to Enterocytozoon hepatopenaei (EHP) Infection
Source: MDPI journal article supplement (doi:10.3390/fishes8020092), 2023-02-05
Supplement: s1 [file s1]

**Table S1.** Primers used for qRT-PCR in this study.

| Name     | Primer sequence (5' → 3') | Purpose |
|----------|---------------------------|---------|
| LDHA-F   | CATCCTTCTCGTCGTCTCCA      | qRT-PCR |
| LDHA-R   | CGCACGCCAGCAATGTTTA       |         |
| Aldoa-F  | ATGAGCTGAAGAGGATTGCTGA    | qRT-PCR |
| Aldoa-R  | GATAGACGGTTTCGTGGAAGAG    |         |
| CKM-F    | TTCAAGGGAAAGTACTACCCCC    | qRT-PCR |
| CKM-R    | TCCTCGTTCACCCAGACCAA      |         |
| HK2-F    | GACTTCCTCGCTGATTGTCTCG    | qRT-PCR |
| HK2-R    | TCACCTCTTCTTTGGATGGCTT    |         |
| Fdh-F    | TTGGTCTTGGGGCTGTTGGT      | qRT-PCR |
| Fdh-R    | TTTTGGTGCTCGGTGGGGTT      |         |
| ADH5-F2  | CAACCCGAACGAGCAAGACA      | qRT-PCR |
| ADH5-R2  | CCCCTATGAGGACGCAATGA      |         |
| DHDH-F   | GGAGGCTGTATGGTCCAGATTTT   | qRT-PCR |
| DHDH-R   | CAAGGGTGGCACTTGTCGTTT     |         |
| ELOVL6-F | TACTACGCCCTCAAAGCCCTGA    | qRT-PCR |
| ELOVL6-R | CGTTGCCTGCCTGTTTAACCT     |         |
| 18S-F    | TATACGCTAGTGGAGCTGGAA     | qRT-PCR |
| 18S-R    | GGGGAGGTAGTGACGAAAAAT     |         |
