# Supplementary material for: Transcriptomic and Metabolomic Analyses of Palaemon carinicauda Hepatopancreas in Response to Enterocytozoon hepatopenaei (EHP) Infection
Source: MDPI journal article supplement (doi:10.3390/fishes8020092), 2023-02-05
Supplement: s1 [file s1]

**Table S2.** Statistics of assembly quality

| Item   | Genes<br>Number | N50<br>number | N50<br>length | Max<br>length | Min<br>length | Average<br>length | Total assembled<br>bases |
|--------|-----------------|---------------|---------------|---------------|---------------|-------------------|--------------------------|
| Number | 69322           | 9176          | 1645          | 24397         | 201           | 862               | 59811372                 |
